# Supplementary material for: ROY confined in hydrogen-bonded frameworks: coercing conformation of a chromophore
Source: Royal Society of Chemistry journal article supplement (doi:10.1039/d0qm00200c), 2020-01-01
Supplement: d0qm00200c1.pdf [file d0qm00200c1.pdf]

# ROY Confined in Hydrogen-Bonded Frameworks: Coercing Conformation of a Chromophore

Sishuang Tang<sup>a</sup>, Anna Yusov<sup>a</sup>, Yuantao Li<sup>a</sup>, Melissa Tan<sup>a</sup>, Yunhui Hao<sup>a</sup>, Zongzhe Li<sup>a</sup>, Yu-Sheng Chen<sup>b</sup>, Chunhua T. Hu<sup>a</sup>, Bart Kahr<sup>a</sup>, Michael D. Ward<sup>a\*</sup>

*a* Department of Chemistry and the Molecular Design Institute, New York University, 100 Washington Square East, New York, NY 10003. e-mail: [mdw3@nyu.edu](mailto:mdw3@nyu.edu)

*b* ChemMatCARS, Center for Advanced Radiation Sources, The University of Chicago, Lemont, Illinois 60439, United States

## Supplementary information

### Contents

#### Materials and Methods

#### Characterization Methods

#### Crystallization Methods

**Table S1.** Crystallographic data of inclusion compounds **1 - 6**

**Table S2.** Structural features of inclusion compounds **1 - 6**

**Table S3.** Physical properties of ROY polymorphs

**Table S4.** Interplanar angles and distances between ROY and organosulfonate pillars of **1 - 6**

**Fig. S1.** Crystal images and Miller plane indexing of **1 - 6**

**Fig. S2 - S8.** Crystal structures of **1 - 6**

**Fig. S9.** GS Pillar-ROY intermolecular contacts in **1 - 6**

#### References

**Materials** 5-Methyl-2-[(2-nitrophenyl)amino]-3-thiophenecarbonitrile (a.k.a. ROY) was purchased from Tokyo Chemical Industry Co., Ltd (Tokyo, Japan).

The various organosulfonic acids or their sodium salts were purchased or synthesized using standard procedures.<sup>1,2</sup> Sodium salts of the sulfonic acids were converted to the acid form by passing them through an Amberlyst 36 ion-exchange column. Guanidinium organosulfonate apohosts were prepared by combining acetone solutions of approximately 1.10 molar equivalents of guanidinium tetrafluoroborate and 1.0 molar equivalents of a selected organosulfonic acid to produce a precipitate of the corresponding guest-free apohost of the GS compound<sup>3</sup>. The mixture was dried in a rotary evaporator and the resulting solid was washed with acetone several times and dried *in vacuo*, affording the apohost of the GS compound. GS-ROY inclusion compounds were prepared according to the specifications below. Single crystals of the inclusion compounds were sometimes accompanied by crystals of ROY, but the inclusion compound crystals were distinguished readily by their morphology and color.

**Single crystal X-ray diffraction.** Single crystal X-ray diffraction data **1** through **5** was obtained using a Bruker SMART APEX II diffractometer equipped with a CCD detector. The X-ray beam generated from a sealed Mo tube was monochromated by a graphite crystal and collimated by a MonoCap collimator. The wavelength from the Mo K $\alpha$  radiation is 0.71073 Å. Crystal temperature (100 K) was controlled by an Oxford Cryosystems 700+ Cooler. Crystals were mounted on a 0.2 mm MicroMount (MiTeGen) with Type B immersion oil (Cargille Labs). Crystal **6** was measured at 100 K at the ChemMatCARS beamline of the Advanced Photon Source at Argonne National Laboratory, using a Bruker APEX II CCD detector and an Oxford Cryojet Cooler. A double monochromatic incident X-ray beam of 0.2 mm  $\times$  0.2 mm in size was used, conditioned using Si(111) and Si(311) monochromators to have an energy of 30 keV ( $\lambda$  = 0.41328 Å). The detector was mounted orthogonally to the beam path with a sample-to-detector distance of 80 mm. Two  $\phi$  scans were performed with an exposure time of 0.2 seconds per frame. The structures were solved by SHELXT<sup>4</sup> and refined with full-matrix least squares by SHELXL (Sheldrick 2014).<sup>5</sup> The refinement details are described below. Crystallographic data of these structures, including cif, fcf, and hkl files, have been deposited with the Cambridge Crystallographic Data Centre with Numbers 1992984-1992989. Copies of these data can be requested, free of charge, from the CCDC website at <https://www.ccdc.cam.ac.uk/structures/>.

**Compound 1.** Non-hydrogen atoms of compound **1** were refined with anisotropic displacement parameters (ADPs), and hydrogen atoms were placed in idealized positions and refined with riding models except the hydrogen on amino group of the ROY molecule, in which the position of the N-H hydrogen was refined with the restrained distance of 0.86 Å using the DFIX command. This refinement routine was applied to all six structures unless there was any difference, which is described where relevant. In compound **1** one of the biphenyl groups of the sulfonate anions is disordered over the inversion center; so both of its phenyl rings were refined using the rigid ideal model (a regular hexagon with a C-C distance of 1.39 Å with the AFIX 66 command) and ADPs of each six carbons were constrained to be equal to prevent from becoming non positive definite (NPD, i.e. one of three principal mean square atomic displacements turns negative) using the EADP command.

**Compound 2.** There are two independent molecules of Compound **2** per an asymmetric unit. No disorder was observed. The only restraints were applied to the N-H distance of each ROY molecule (DFIX).

**Compound 3.** There are two independent molecules of Compound **3** per an asymmetric unit. One of two phenyl rings of each azobenzenedisulfonate anion is disordered. Similar to compound **1**, the rigid model was applied to these phenyl rings with AFIX and EADP commands. One ROY and one methanol molecules with 50% occupancy are disordered over inversion center. In addition, another ROY molecule is also disordered in two conformations and two conformers have a refined occupancy ratio of almost 50%:50%. Some ADP constraints (EADP) were applied to these disordered molecules whenever necessary and only one distance restraint (DFIX) was used for one of the S-C bond.

**Compound 4.** No disorder was observed in Compound 4. The only restraint was applied to the N-H distance of a ROY molecule (DFIX).

**Compound 5.** No disorder was observed in Compound 5. No restraint was applied.

**Compound 6.** The CN group of the ROY molecule in compound 6 is disordered in three positions with a refined occupancy ratio of 53.6%:26.6%:19.8%. The constraints on their ADPs (EADP) and restraints on the C-N bond distances (SADI) were applied to these disordered units.

**Preparation of compound 1.** Slow evaporation under ambient conditions of 0.5 mL of methanol and 1 mL of acetonitrile containing 3 mg guanidinium 4,4'-biphenyldisulfonate and 1 mg ROY (2.85:1 molar ratio) for 48 hours afforded orange red plates of  $G_2BPDS \supset (ROY)_{2/3}$  (**1**) mixed with single crystals of ROY.

**Preparation of compound 2.** Slow evaporation under ambient conditions of 1 mL of methanol and 0.5 mL of acetonitrile containing 3 mg guanidinium 1,2-bis(4-sulfonatophenyl)ethane ( $G_2BSPE$ ) and 1 mg ROY (2.59:1 molar ratio) for 48 hours afforded red plates of  $G_2BSPE \supset ROY$  (**2**) mixed with single crystals of ROY.

**Preparation of compound 3.** Slow evaporation under ambient condition of 0.50 mL of ethyl acetate and 0.5 mL methanol containing 10 mg guanidinium azobenzenedisulfonate ( $G_2ABDS$ ) and 3 mg ROY (3.47:1 molar ratio) for 72 hours afforded red slabs of  $G_2ABDS \supset (ROY)_{3/4}(\text{methanol})_{1/4}$  (**3**) mixed with single crystals of ROY.

**Preparation of compound 4.** Slow evaporation under ambient conditions of 0.75 mL of methanol and 0.5 mL of acetonitrile containing 4 mg guanidinium 4,4'-silbenedisulfonate ( $G_2SDS$ ) and 1.5 mg ROY (2.32:1 molar ratio) for 48 hours afforded red needles of  $G_2SDS \supset ROY$  (**4**) mixed with single crystals of ROY.

**Preparation of compound 5.** Slow evaporation under ambient conditions of 0.75 mL of methanol and 0.5 mL of acetonitrile containing 5 mg guanidinium 1,2-bis(4-sulfonatophenoxy)ethane ( $G_2BSPOE$ ) and 1.5 mg ROY (2.60:1 molar ratio) for 48 hours afforded red needles of  $G_2BSPOE \supset ROY$  (**5**) mixed with single crystals of ROY.

**Preparation of compound 6.** Slow evaporation under ambient conditions of 0.5 mL of methanol and 1 mL of acetonitrile containing 2 mg guanidinium 2,6-anthracenedisulfonate ( $G_2ADS$ ) and 1 mg ROY (1.75:1 molar ratio) for 48 hours afforded yellow plates of  $G_2ADS \supset (ROY)_2$  (**6**) mixed with single crystals of ROY.

**Table S1.** Crystallographic data of inclusion compounds **1 - 6**.

| Compound name                                                            | G <sub>2</sub> BPDS $\supset$<br>(ROY) <sub>2/3</sub>                          | G <sub>2</sub> BSPE $\supset$<br>ROY                                         | G <sub>2</sub> ABDS $\supset$<br>(ROY) <sub>3/4</sub> (methanol) <sub>1/4</sub>  | G <sub>2</sub> SDS $\supset$ ROY                                             | G <sub>2</sub> BSPOE $\supset$<br>ROY                                         | G <sub>2</sub> ADS $\supset$<br>(ROY) <sub>2</sub>                             |
|--------------------------------------------------------------------------|--------------------------------------------------------------------------------|------------------------------------------------------------------------------|----------------------------------------------------------------------------------|------------------------------------------------------------------------------|-------------------------------------------------------------------------------|--------------------------------------------------------------------------------|
| Compound no.                                                             | 1                                                                              | 2                                                                            | 3                                                                                | 4                                                                            | 5                                                                             | 6                                                                              |
| Lab code                                                                 | 19mdw13h                                                                       | 18mdw9l                                                                      | 19mdw15h                                                                         | 19mdw12h                                                                     | 19mdw9h                                                                       | 18mdw1r-APS                                                                    |
| CCDC no.                                                                 | 1992984                                                                        | 1992985                                                                      | 1992986                                                                          | 1992987                                                                      | 1992988                                                                       | 1992989                                                                        |
| Formula by X-ray                                                         | C <sub>33</sub> H <sub>39</sub> N <sub>12</sub> O <sub>11</sub> S <sub>4</sub> | C <sub>28</sub> H <sub>33</sub> N <sub>9</sub> O <sub>8</sub> S <sub>3</sub> | C <sub>93</sub> H <sub>111</sub> N <sub>41</sub> O <sub>31</sub> S <sub>11</sub> | C <sub>28</sub> H <sub>31</sub> N <sub>9</sub> O <sub>8</sub> S <sub>3</sub> | C <sub>28</sub> H <sub>33</sub> N <sub>9</sub> O <sub>10</sub> S <sub>3</sub> | C <sub>40</sub> H <sub>38</sub> N <sub>12</sub> O <sub>10</sub> S <sub>4</sub> |
| Formula weight                                                           | 908.00                                                                         | 719.81                                                                       | 2651.88                                                                          | 717.80                                                                       | 751.81                                                                        | 975.09                                                                         |
| Crystal habit                                                            | red plate                                                                      | red plate                                                                    | red slab                                                                         | red needle                                                                   | red needle                                                                    | yellow plate                                                                   |
| Crystal size (mm)                                                        | 0.56×0.24×0.02                                                                 | 0.23×0.16×0.09                                                               | 0.02×0.10×0.36                                                                   | 0.06×0.06×0.44                                                               | 0.29×0.04×0.03                                                                | 0.35×0.20×0.02                                                                 |
| Crystal system                                                           | triclinic                                                                      | orthorhombic                                                                 | monoclinic                                                                       | orthorhombic                                                                 | orthorhombic                                                                  | orthorhombic                                                                   |
| Space group (no.)                                                        | <i>P</i> $\bar{1}$ (2)                                                         | <i>Pc</i> (7)                                                                | <i>C2/c</i> (15)                                                                 | <i>Pbca</i> (61)                                                             | <i>P2<sub>1</sub>2<sub>1</sub>2<sub>1</sub></i> (19)                          | <i>Pbca</i> (61)                                                               |
| <i>a</i> (Å)                                                             | 7.5436(11)                                                                     | 17.657(3)                                                                    | 35.6995(9)                                                                       | 14.4038(11)                                                                  | 7.3192(4)                                                                     | 12.1138(6)                                                                     |
| <i>b</i> (Å)                                                             | 14.768(2)                                                                      | 14.581(2)                                                                    | 7.3345(2)                                                                        | 13.1032(10)                                                                  | 17.1147(9)                                                                    | 12.6936(6)                                                                     |
| <i>c</i> (Å)                                                             | 18.565(3)                                                                      | 13.1035(19)                                                                  | 48.5783(12)                                                                      | 34.569(3)                                                                    | 27.6428(14)                                                                   | 28.9704(14)                                                                    |
| $\alpha$ (°)                                                             | 91.078(3)                                                                      | 90                                                                           | 90                                                                               | 90                                                                           | 90                                                                            | 90                                                                             |
| $\beta$ (°)                                                              | 96.757(2)                                                                      | 104.786(2)                                                                   | 109.3873(7)                                                                      | 90                                                                           | 90                                                                            | 90                                                                             |
| $\gamma$ (°)                                                             | 94.637(3)                                                                      | 90                                                                           | 90                                                                               | 90                                                                           | 90                                                                            | 90                                                                             |
| <i>V</i> (Å <sup>3</sup> )                                               | 2046.2(5)                                                                      | 3261.9(8)                                                                    | 11998.4(5)                                                                       | 6524.5(8)                                                                    | 3462.7(3)                                                                     | 4454.7(4)                                                                      |
| <i>Z</i>                                                                 | 2                                                                              | 4                                                                            | 4                                                                                | 8                                                                            | 4                                                                             | 4                                                                              |
| <i>D<sub>c</sub></i> (g cm <sup>-3</sup> )                               | 1.474                                                                          | 1.466                                                                        | 1.468                                                                            | 1.461                                                                        | 1.442                                                                         | 1.454                                                                          |
| <i>F</i> (000)                                                           | 946                                                                            | 1504                                                                         | 5520                                                                             | 2992                                                                         | 1568                                                                          | 2024                                                                           |
| $\mu$ (mm <sup>-1</sup> )                                                | 0.305                                                                          | 0.291                                                                        | 0.293                                                                            | 0.291                                                                        | 0.282                                                                         | 0.078                                                                          |
| Total reflections                                                        | 31243                                                                          | 40997                                                                        | 102340                                                                           | 74912                                                                        | 49006                                                                         | 167081                                                                         |
| Unique reflections                                                       | 7541                                                                           | 12366                                                                        | 10939                                                                            | 6675                                                                         | 6121                                                                          | 8673                                                                           |
| <i>R</i> <sub>int</sub>                                                  | 0.0693                                                                         | 0.0784                                                                       | 0.0894                                                                           | 0.0547                                                                       | 0.0996                                                                        | 0.0688                                                                         |
| <i>R</i> <sub>1</sub> <sup>a</sup> [ <i>I</i> > 2 $\sigma$ ( <i>I</i> )] | 0.0558                                                                         | 0.0541                                                                       | 0.0556                                                                           | 0.0792                                                                       | 0.0462                                                                        | 0.0500                                                                         |
| <i>wR</i> <sub>2</sub> <sup>b</sup> (all data)                           | 0.1582                                                                         | 0.1191                                                                       | 0.1407                                                                           | 0.1421                                                                       | 0.1085                                                                        | 0.1528                                                                         |
| GOF (all data)                                                           | 1.020                                                                          | 1.000                                                                        | 1.017                                                                            | 1.075                                                                        | 1.022                                                                         | 1.046                                                                          |
| Flack parameter                                                          | n.a.*                                                                          | 0.01(4)                                                                      | n.a.                                                                             | n.a.                                                                         | -0.04(7)                                                                      | n.a.                                                                           |

\* n.a. = not applicable

**Table S2.** Structural features of inclusion compounds **1** through **6**.

| No.      | Formula                                                            | Architecture | $V_{pillar}$<br>(Å <sup>3</sup> ) <sup>a</sup> | $V_g$ (Å <sup>3</sup> ) <sup>b</sup> | $V_{inc}$<br>(Å <sup>3</sup> ) <sup>b</sup> | Overall<br>packing<br>fraction <sup>c</sup> | % $V_{inc}$<br>occupied |
|----------|--------------------------------------------------------------------|--------------|------------------------------------------------|--------------------------------------|---------------------------------------------|---------------------------------------------|-------------------------|
| <b>1</b> | G <sub>2</sub> BPDS⊃(ROY) <sub>2/3</sub>                           | Bilayer      | 166                                            | 207                                  | 479                                         | 70.8%                                       | 43.3%                   |
| <b>2</b> | G <sub>2</sub> BSPE⊃ROY                                            | Bilayer      | 200                                            | 207                                  | 433                                         | 70.4%                                       | 47.8%                   |
| <b>3</b> | G <sub>2</sub> ABDS⊃(ROY) <sub>3/4</sub> (methanol) <sub>1/4</sub> | Bilayer      | 188                                            | 214                                  | 432                                         | 72.2%                                       | 49.4%                   |
| <b>4</b> | G <sub>2</sub> SDS⊃ROY                                             | Bilayer      | 196                                            | 208                                  | 436                                         | 70.1%                                       | 47.7%                   |
| <b>5</b> | G <sub>2</sub> BSPOE⊃ROY                                           | Double brick | 198                                            | 207                                  | 471                                         | 68.0%                                       | 43.9%                   |
| <b>6</b> | G <sub>2</sub> ADS⊃(ROY) <sub>2</sub>                              | Zigzag brick | 185                                            | 208                                  | 381                                         | 68.9%                                       | 54.6%                   |

<sup>a</sup>  $V_{pillar}$  values are available in our previous publication<sup>6</sup>. <sup>b</sup> Molecular volume ( $V_g$ ,  $V_{inc}$ ) calculations were performed using BIOVIA Materials Studio 2018. Guest molecule ( $V_g$ ) and organosulfonate pillar ( $V_{pillar}$ ) volumes were determined from Connolly surfaces using a probe radius of zero. Inclusion cavity volumes ( $V_{inc}$ ) were determined from Connolly surfaces using a 0.5 Å probe. All volumes are normalized to one formula unit.  $V_{pillar}$  corresponds to the organic component only. <sup>c</sup> Overall packing fraction was calculated as the sum of volume of organosulfonate pillars (including sulfonate groups), guest molecules and guanidinium cations (55 Å<sup>3</sup> per cation) in each unit cell divided by the volume of the unit cell.

**Table S3.** Physical properties of ROY polymorphs<sup>7, 8, 9</sup>

|                                | R    | R05     | ORP        | OP     | ON     | YN     | Y      | YT04   | PO13           |
|--------------------------------|------|---------|------------|--------|--------|--------|--------|--------|----------------|
| Color                          | Red  | Red     | Orange-red | Orange | Orange | Yellow | Yellow | Yellow | Pumpkin-orange |
| $\theta_{thio}$ (°)            | 21.7 | 34/44.9 | 39.4       | 46.1   | 52.6   | 104.1  | 104.7  | 112.8  | 122.1          |
| $\nu_{CN}$ (cm <sup>-1</sup> ) | 2212 | 2205    | 2217       | 2226   | 2224   | 2222   | 2231   | 2224   | 2228.2         |

**Table S4.** Interplanar angles and distances between ROY and organosulfonate pillars.

| Inclusion Compound | ROY<br>( $\theta_{thio}$ degrees) | Interplanar angles (degrees)      |                                | Interplanar distances (Angstroms) |                                |
|--------------------|-----------------------------------|-----------------------------------|--------------------------------|-----------------------------------|--------------------------------|
|                    |                                   | (Pillar)phenyl:<br>(thiophene)ROY | (Pillar)phenyl:<br>(pehnyl)ROY | (Pillar)phenyl:<br>(thiophene)ROY | (Pillar)phenyl:<br>(pehnyl)ROY |
| <b>1</b>           | 10.53                             | 7.81                              | 4.68                           | 3.52                              | 3.22                           |
| <b>2</b>           | 14.74                             | 4.55                              | 4.19                           | 3.30                              | 3.33                           |
|                    | 14.32                             | 5.06                              | 4.30                           | 3.29                              | 3.34                           |
| <b>3</b>           | 16.15                             | 25.18                             | 1.70                           | 2.95                              | 3.37                           |
|                    | 17.33                             | 3.91                              | 0.57                           | 3.53                              | 3.62                           |
| <b>4</b>           | 25.08                             | 6.43                              | 1.88                           | 3.25                              | 3.33                           |
| <b>5</b>           | 32.56                             | 20.15                             | 8.83                           | 3.29                              | 3.45                           |
| <b>6</b>           | 56.38                             | N/A                               | 6.81                           | N/A                               | 3.51                           |

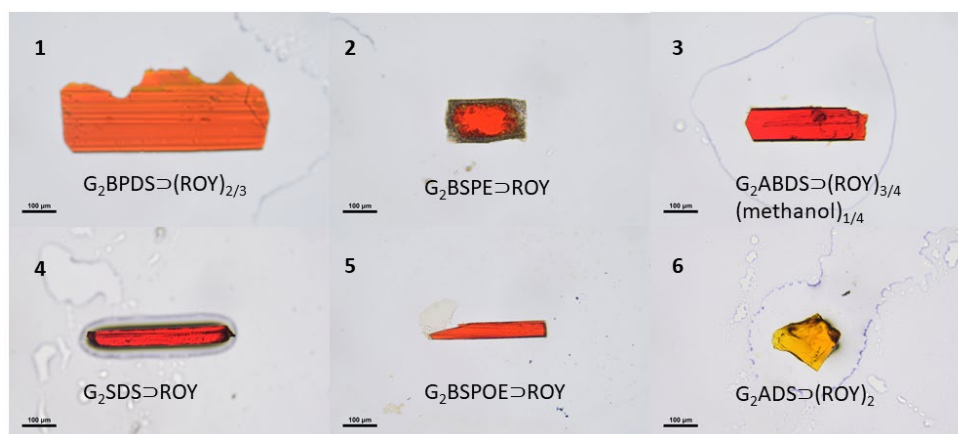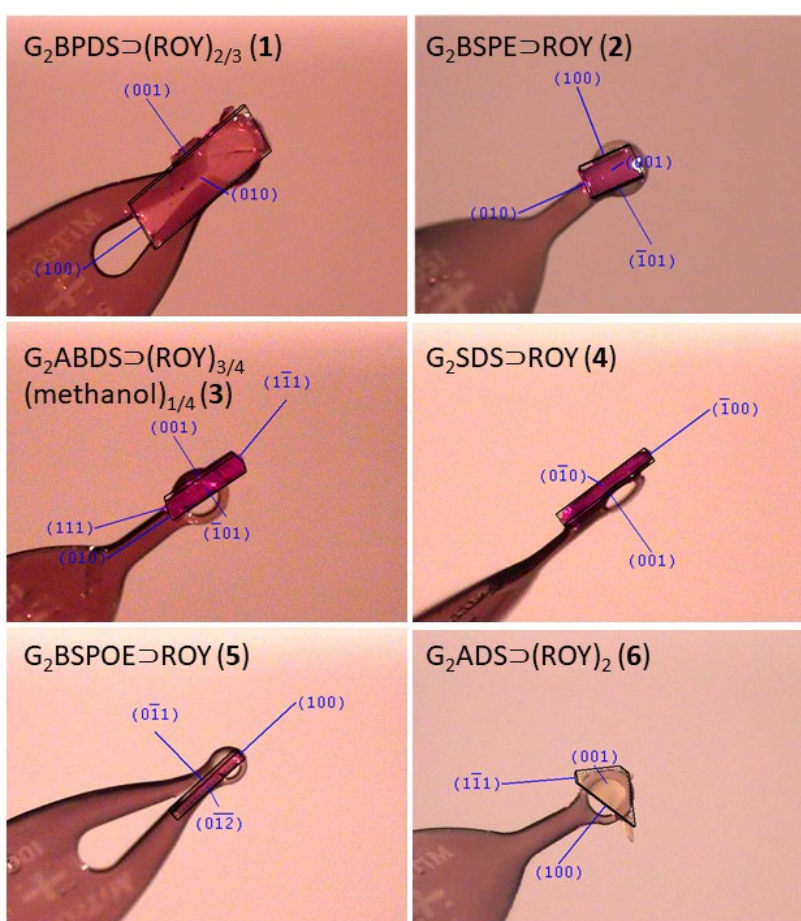

**Fig. S1.** (top) Images of single crystals of inclusion compounds **1** - **6**. (bottom) Crystals mounted on diffraction loops with Miller indices assigned.

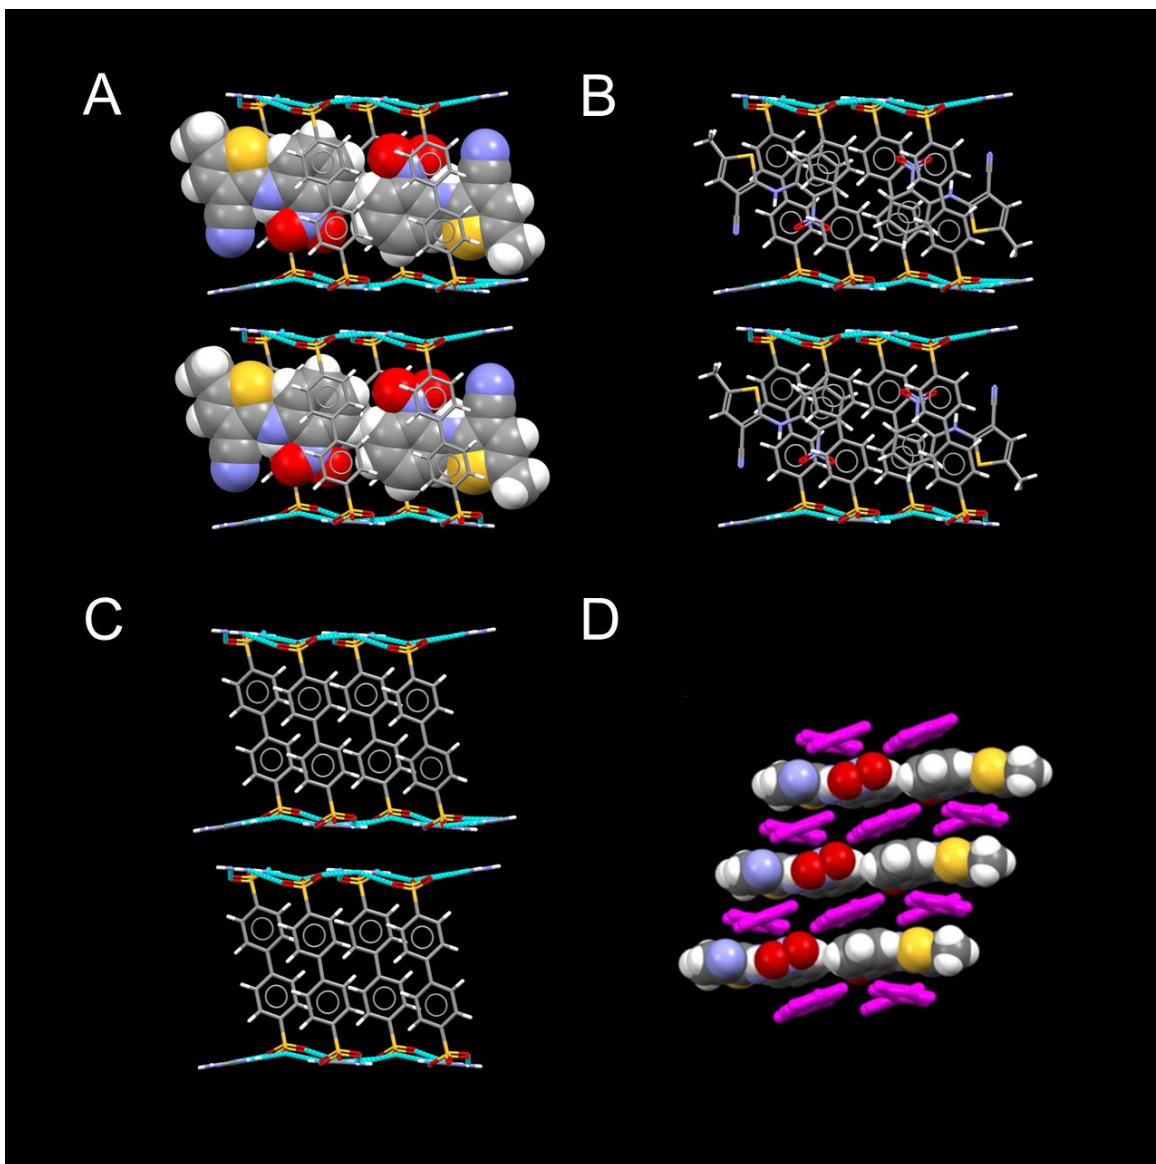

**Fig. S2.** Crystal structure of **1** viewed down the *a*-axis. (A) Guest molecules are rendered as space-filled and the host framework as stick. (B) Guests and host framework both rendered as stick. (C) View of the host framework *ac* plane without guests, illustrating the bilayer framework. (D) View of the *ac* plane with guanidinium and sulfonate ions removed to reveal the packing of the organic residues (magenta) of the organosulfonate pillars and the guests.

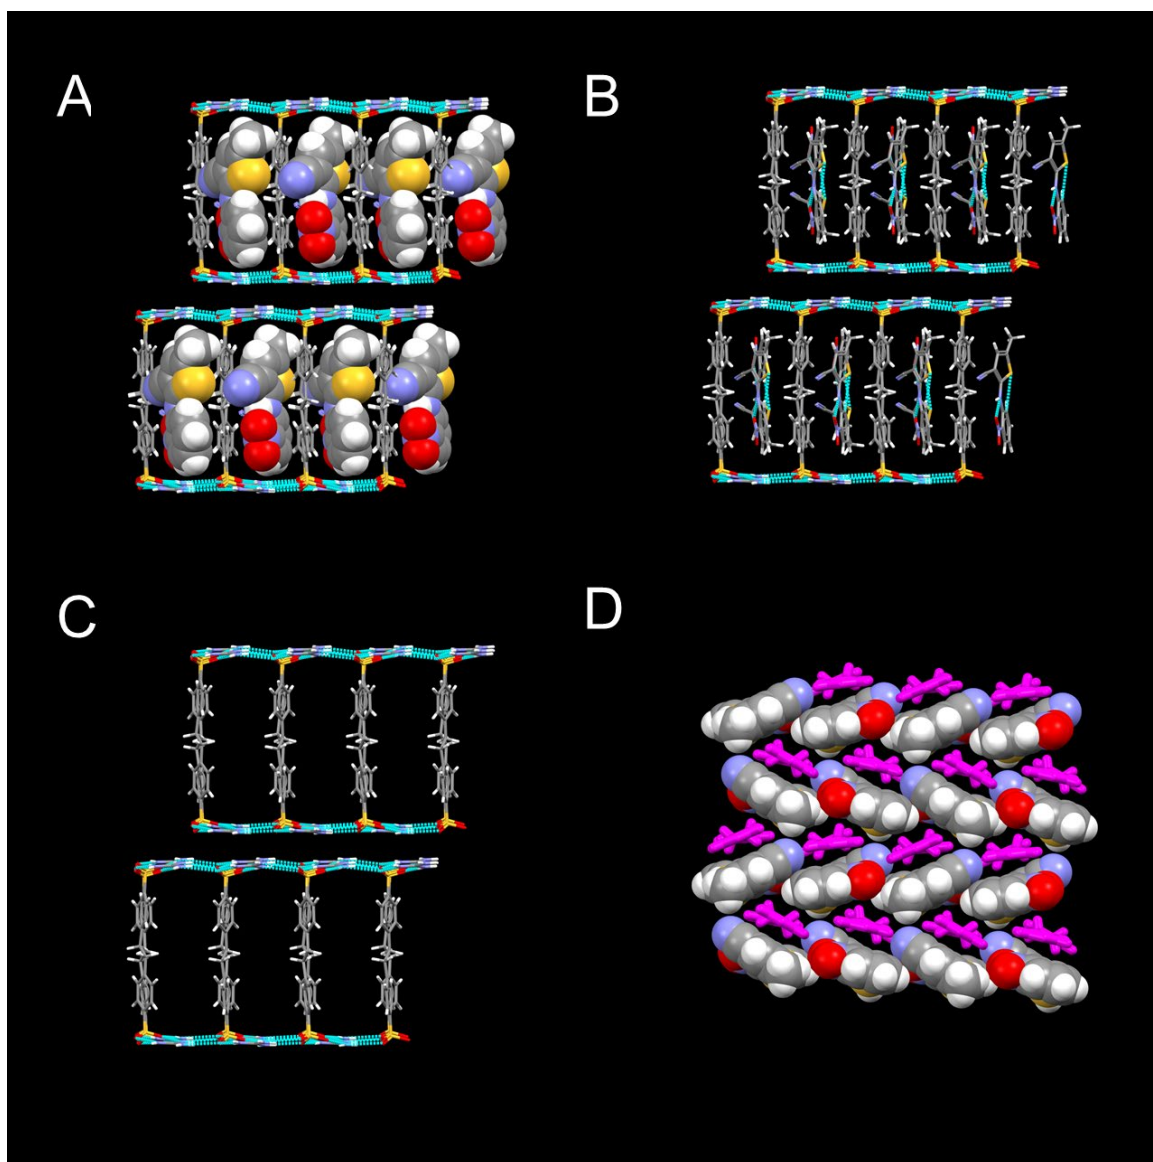

**Fig. S3.** Crystal structure of **2** viewed down the *b*-axis. (A) Guest molecules are rendered as space-filled and the host framework as stick. (B) Guests and host framework both rendered as stick. (C) View of the host framework *ac* plane without guests, illustrating the bilayer framework. (D) View of the *bc* plane with guanidinium and sulfonate ions removed to reveal the packing of the organic residues (magenta) of the organosulfonate pillars and the guests.

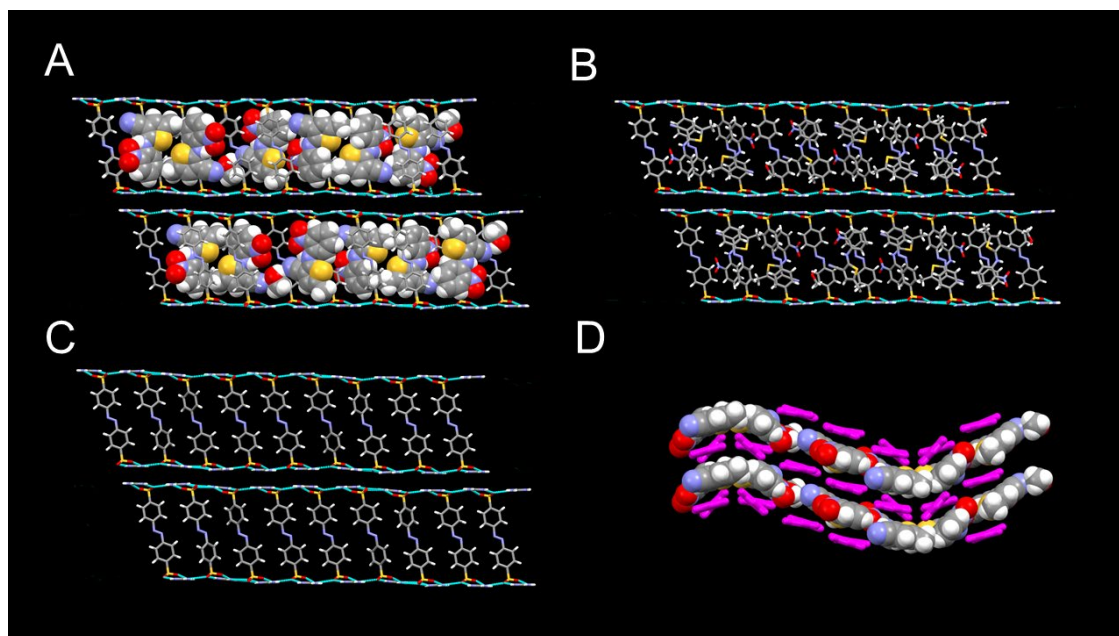

**Fig. S4** Crystal structure of **3** viewed down the *b*-axis. (A) Guest molecules are rendered as space-filled and the host framework as stick. (B) Guests and host framework both rendered as stick. (C) View of the host framework *ac* plane without guests, illustrating the bilayer framework. (D) View of the *bc* plane with guanidinium and sulfonate ions removed to reveal the packing of the organic residues (magenta) of the organosulfonate pillars and the guests.

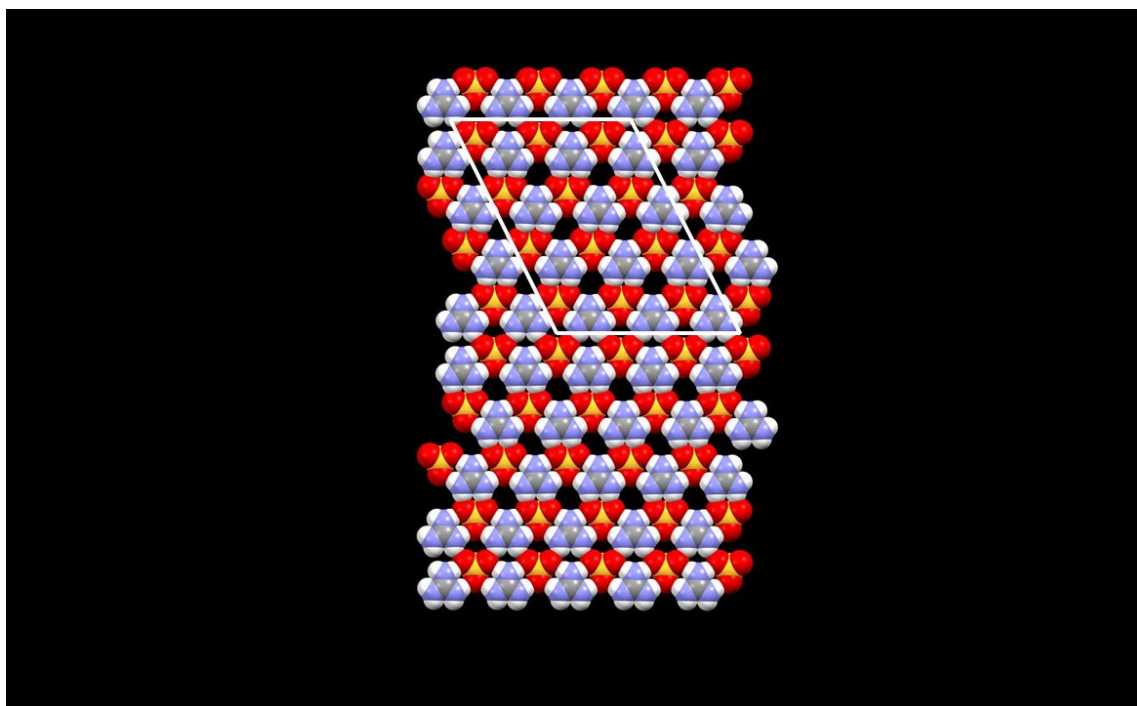

**Fig. S5** View of the hydrogen-bonded sheet of compound **3**, rendered as space-filled. The parallelogram (from top to bottom) captures the four GS ribbons, preceded and followed by a ribbon that is shifted.

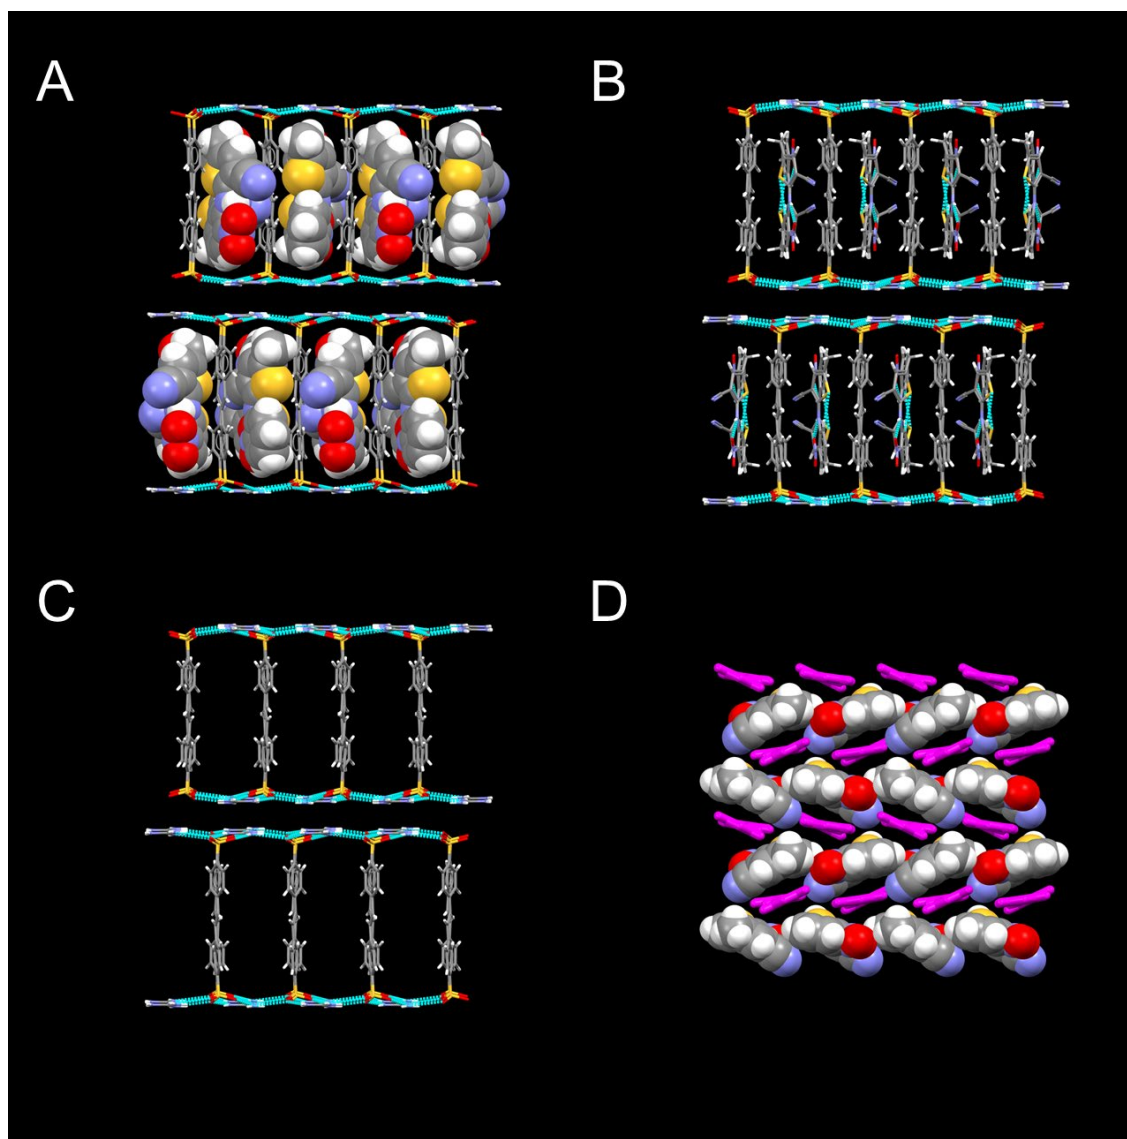

**Fig. S6.** Crystal structure of **4** viewed down the *a*-axis. (A) Guest molecules are rendered as space-filled and the host framework as stick. (B) Guests and host framework both rendered as stick. (C) View of the host framework *ac* plane without guests, illustrating the bilayer framework. (D) View of the *ab* plane with guanidinium and sulfonate ions removed to reveal the packing of the organic residues (magenta) of the organosulfonate pillars and the guests.

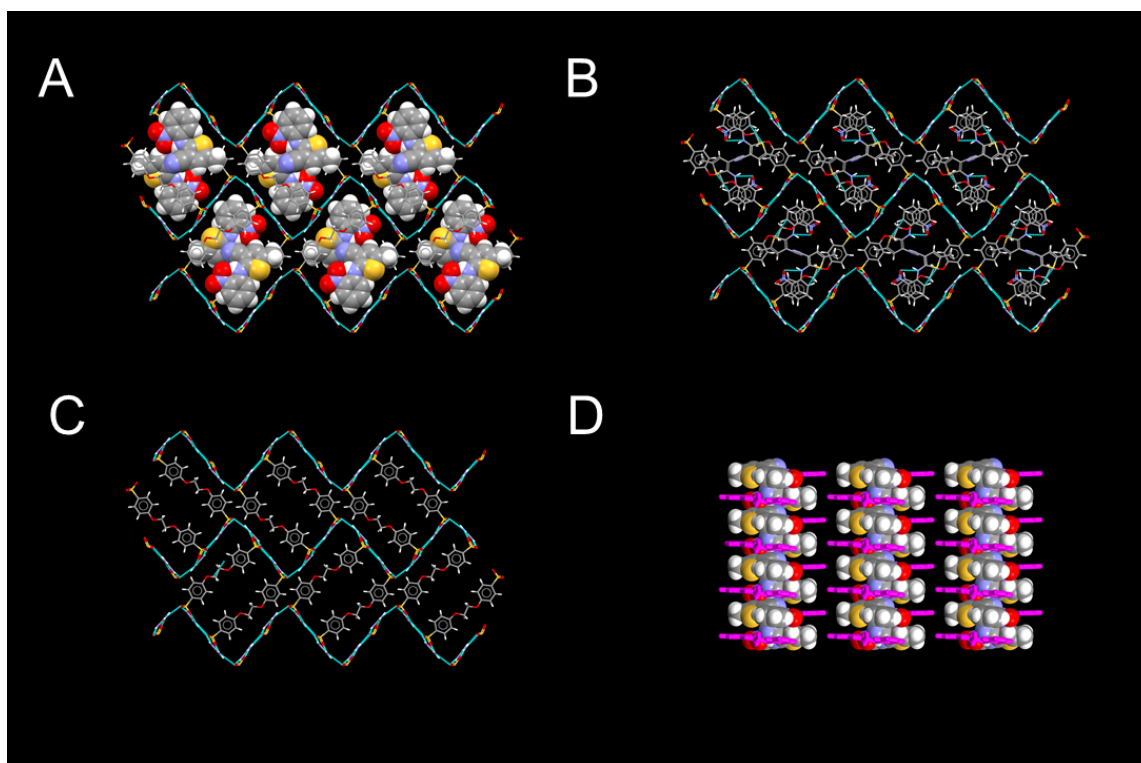

**Fig. S7.** Crystal structure of **5** viewed down the *a*-axis. (A) Guest molecules are rendered as space-filled and the host framework as stick. (B) Guests and host framework both rendered as stick. (C) View of the host framework *ac* plane without guests, illustrating the double brick framework. (D) View of the *ab* plane with guanidinium and sulfonate ions removed to reveal the packing of the organic residues (magenta) of the organosulfonate pillars and the guests.

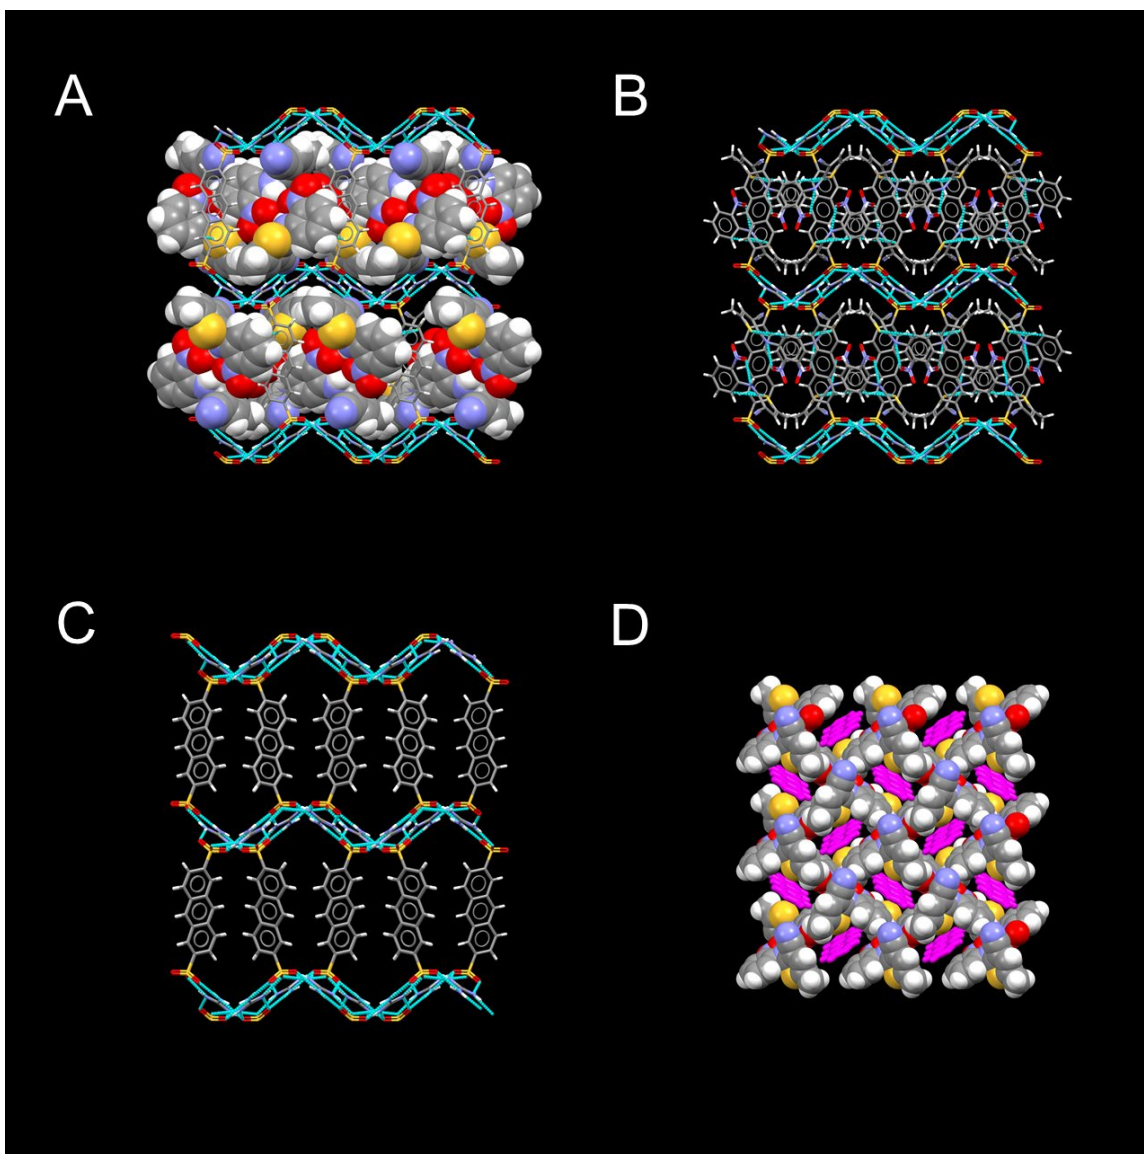

**Fig. S8.** Crystal structure of **6** viewed down the *b*-axis. (A) Guest molecules are rendered as space-filled and the host framework as stick. (B) Guests and host framework both rendered as stick. (C) View of the host framework *ac* plane without guests, illustrating the zigzag brick framework. (D) View of the *ab* plane with guanidinium and sulfonate ions removed to reveal the packing of the organic residues (magenta) of the organosulfonate pillars and the guests.

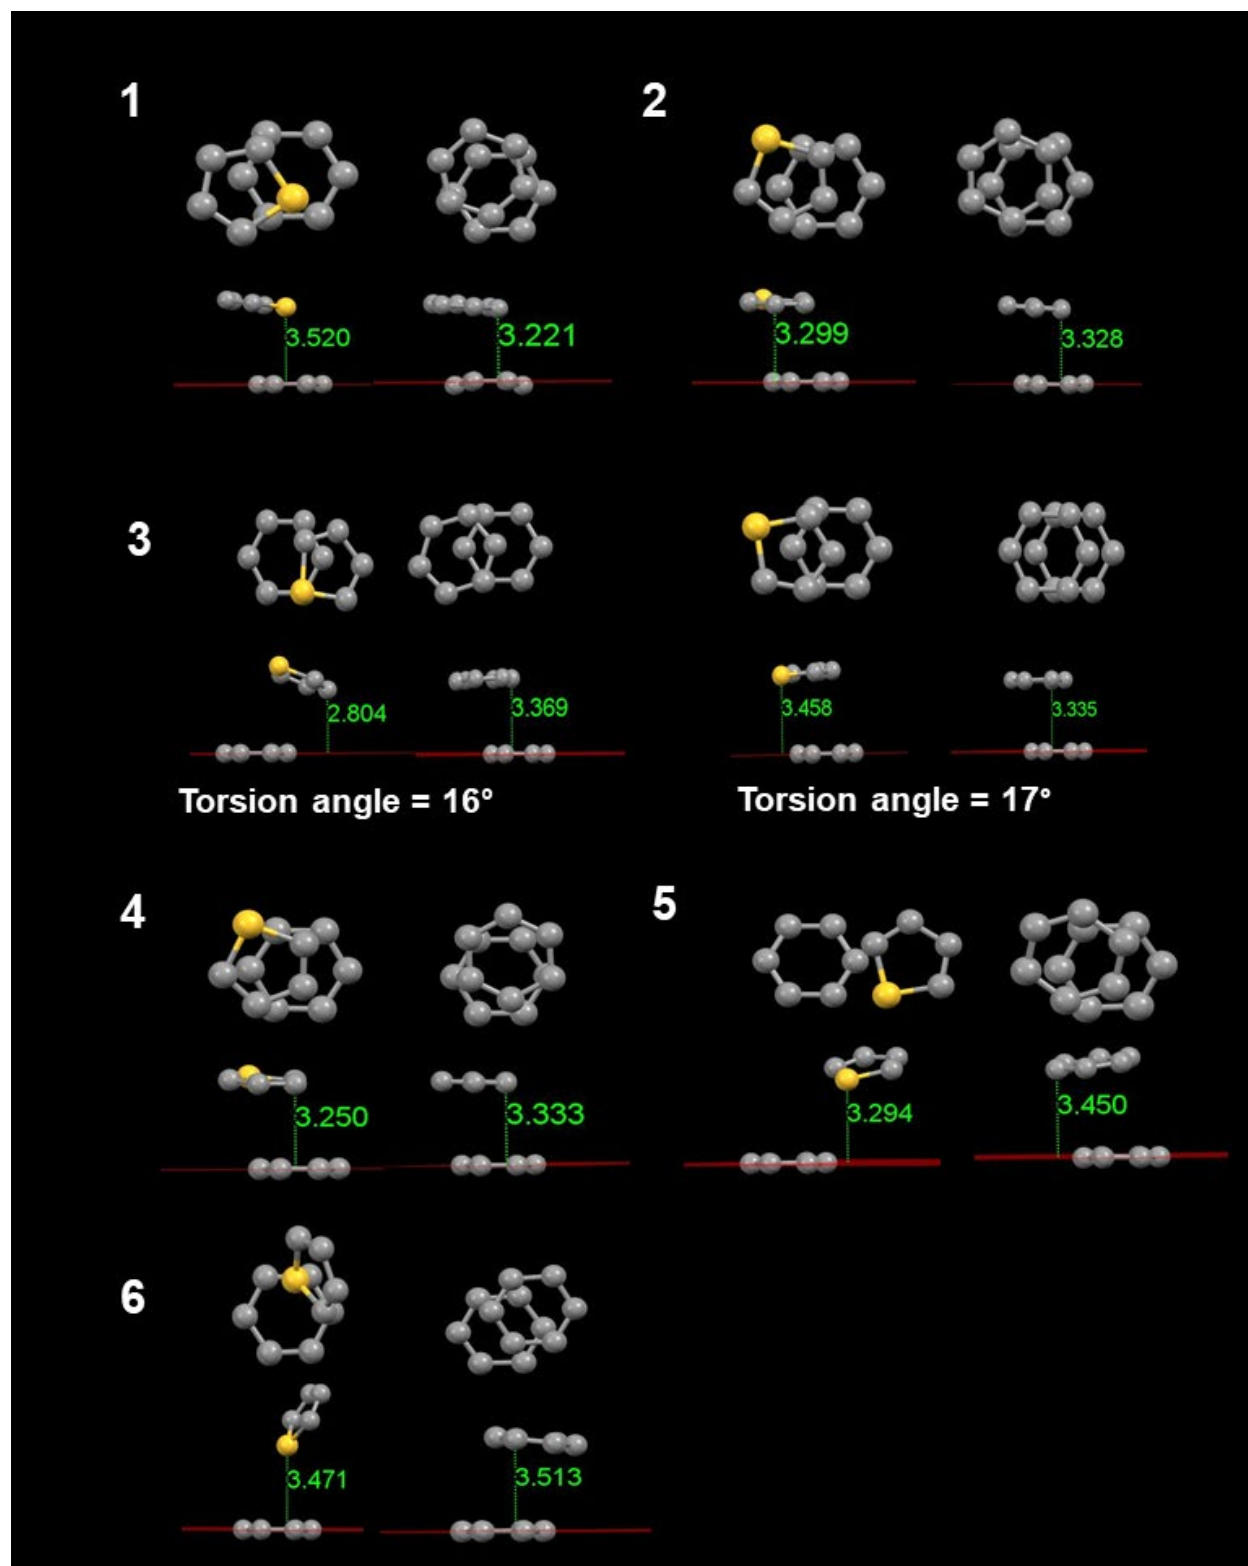

**Fig. S9.** Offset and distances between the ROY thiophene and phenyl ring planes and nearest pillar phenyl rings for inclusion compounds **1** - **6**.

---

## References

1. K. T. Holman, S. M. Martin, D. P. Parker, M. D. Ward, The generality of architectural isomerism in designer inclusion frameworks, *J. Am. Chem. Soc.*, 2001, **123**, 4421.
2. A. C. Soegiarto, A. Comotti, M. D. Ward, Controlled Orientation of Polyconjugated Guest Molecules in Tunable Host Cavities, *J. Am. Chem. Soc.*, 2010, **132**, 14603.
3. M. J. Horner, K. T. Holman, M. D. Ward, Architectural Diversity and Elastic Networks in Hydrogen-Bonded Host Frameworks: From Molecular Jaws to Cylinders, *J. Am. Chem. Soc.*, 2007, **1299**, 14640.
4. G. M. Sheldrick, SHELXT. Program for solving small molecule structures, determining the space group and structure together, Universität Göttingen, Germany, 2014.
5. G. M. Sheldrick, SHELXL. Program for refinement of crystal structures, Universität Göttingen, Germany, 2014.
6. A. C. Soegiarto, M. D. Ward, Directed Organization of Dye Aggregates in Hydrogen-Bonded Host Frameworks, *Cryst. Growth Des.*, 2009, **9**, 3803.
7. M. Tan, A. G. Shtukenberg, S. Zhu, W. Xu, E. Dooryhee, S. M. Nichols, M. D. Ward, B. Kahr, Q. Zhu, ROY revisited, again: the eighth solved structure, *Faraday Discuss.*, 2018, **211**, 477.
8. L. Yu, Polymorphism in Molecular Solids: An Extraordinary System of Red, Orange, and Yellow Crystals, *Acc. Chem. Res.* 2010, **43**, 1257.
9. K. S. Geshurst, J. Nyman, S. X. M. Boerrigter, The PO13 crystal structure of ROY, *CrystEngComm*, 2019, **21**, 1363.
